# Supplementary material for: Mechanisms of impaired mitochondrial homeostasis and NAD+ metabolism in a model of mitochondrial heart disease exhibiting redox active iron accumulation
Source: PubMed Central journal article supplement — Redox Biol. 2021 Jun 10;46:102038. doi: 10.1016/j.redox.2021.102038 (PMC8379503; doi:10.1016/j.redox.2021.102038), 2021-06-10
Supplement: mmc1.pdf [file mmc1.pdf]

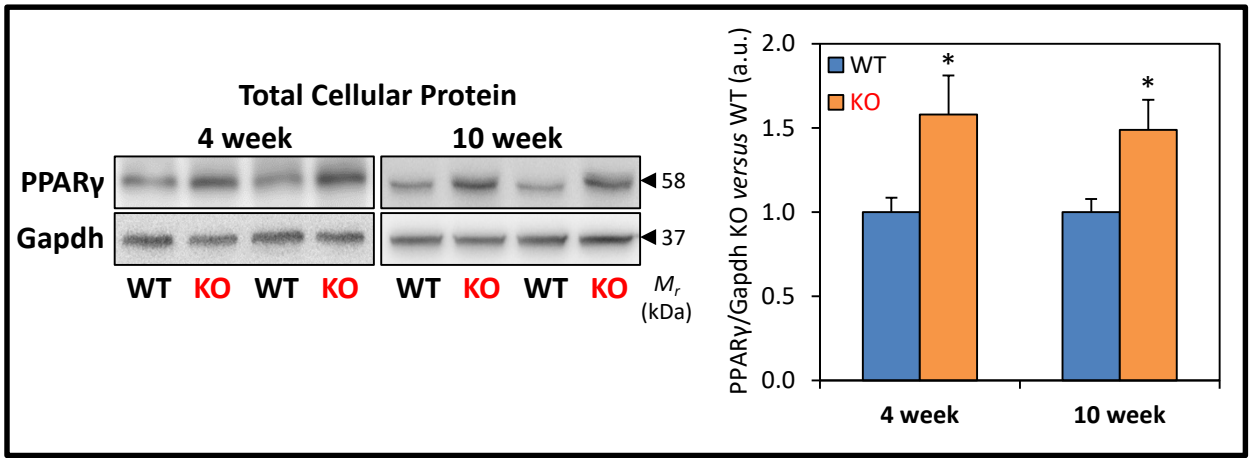

### Supplementary Figure S1.

**Fig. S1 Expression of PPAR $\gamma$  protein in LV tissue of WT and KO littermates at 4 and 10 weeks.** Representative immunoblots and densitometry showing total protein expression of PPAR $\gamma$ . Gapdh was used as a loading control for total protein-loading. Data are mean  $\pm$  SEM (n = 4-6 mice/genotype/age). Unpaired two-tailed Student's *t*-tests were used. \*,  $p < 0.05$ .
